# Supplementary material for: The incidence of falls after first and second eye cataract surgery: a longitudinal cohort study
Source: PubMed Central journal article supplement (PMC9546129; doi:10.5694/mja2.51611), 2022-06-15
Supplement: MJA2-217-94-s001.pdf [file MJA2-217-94-s001.pdf]

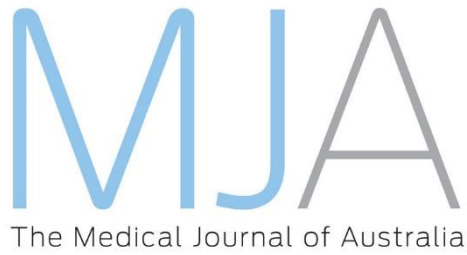

## **Supporting Information**

### **Supplementary methods**

**This appendix was part of the submitted manuscript and has been peer reviewed.  
It is posted as supplied by the authors.**

Appendix to: Keay L, Ho KC, Rogers K, et al. The incidence of falls after first and second eye cataract surgery: a longitudinal cohort study. *Med J Aust* 2022; doi: 10.5694/mja2.51611.

**Table.** Schedule of assessments in the FOCUS study [adapted from Keay et al 2014].<sup>1</sup>

| Recruitment phase<br>Study visit              | Initial   |           | Phase 2   |           |
|-----------------------------------------------|-----------|-----------|-----------|-----------|
|                                               | Baseline* | Follow-up | Baseline* | Follow-up |
| <b>Demographic characteristics</b>            | ✓         | -         | ✓         | -         |
| <b>Vision status</b>                          |           |           |           |           |
| Habitual correction                           | ✓         | ✓         | ✓         | ✓         |
| Refractive correction (focimeter)             | ✓         | ✓         | ✓         | ✓         |
| Autorefracton                                 | ✓         | ✓         | ✓         | ✓         |
| Distance vision                               | ✓         | ✓         | ✓         | ✓         |
| Contrast sensitivity                          | ✓         | ✓         | ✓         | ✓         |
| Visual fields                                 | ✓         | -         | ✓         | -         |
| Stereopsis (Titmus Fly stereo test)           | ✓         | ✓         | ✓         | ✓         |
| Ocular dominance                              | ✓         | -         | ✓         | -         |
| Pupil size                                    | ✓         | -         | ✓         | -         |
| <b>Quality of life</b>                        |           |           |           |           |
| Catquest-9SF                                  | ✓         | ✓         | ✓         | ✓         |
| EQ-5D-5L                                      | ✓         | ✓         | ✓         | ✓         |
| <b>Medical information</b>                    |           |           |           |           |
| Medications and medical history               | ✓         | ✓         | ✓         | ✓         |
| <b>Health service use</b>                     |           |           |           |           |
| Cataract referral and surgery waiting times   | ✓         | ✓         | ✓         | ✓         |
| <b>Independent mobility</b>                   |           |           |           |           |
| Driving Habits Questionnaire                  | ✓         | ✓         | x         | x         |
| Falls (Short Falls Efficacy Scale)            | ✓         | ✓         | ✓         | ✓         |
| Incidental and Planned Exercise Questionnaire | ✓         | ✓         | ✓         | ✓         |
| <b>Mood and socialisation</b>                 |           |           |           |           |
| Keele Assessment of Participation             | ✓         | ✓         | x         | x         |
| Positive and Negative Affect Scale            | ✓         | ✓         | x         | x         |
| Geriatric Depression Scale                    | ✓         | ✓         | x         | x         |
| <b>Physical assessment</b>                    |           |           |           |           |
| Height                                        | ✓         | -         | ✓         | -         |
| Weight                                        | ✓         | -         | ✓         | -         |
| Standing balance                              | ✓         | ✓         | ✓         | ✓         |
| Sit-to-stand five times                       | ✓         | ✓         | ✓         | ✓         |
| Gait speed (timed 4m walk)                    | ✓         | ✓         | ✓         | ✓         |

(✓): performed, (-): not planned and not performed, (x): discontinued in Phase 2 of study.<sup>†</sup>

\*At the completion of the baseline assessment, the monthly falls calendar is provided and the procedure for its completion explained to the participant.

† Every effort was made to support enrolment in Phase 2 of this study despite limited resources. This included modifying the protocol to remove several questionnaires on secondary outcomes in Phase 2 of data collection. Published analyses of these secondary outcomes include those of driving patterns<sup>2</sup> and depressive symptoms.<sup>3</sup> Our published analysis of the impact of first eye surgery on falls was based on the preliminary dataset of 329 patients enrolled between October 2013 and August 2015.<sup>4</sup>

## References

1. Keay L, Palagyi A, McCluskey P, et al. Falls in Older people with Cataract, a longitudinal evaluation of impact and risk: the FOCUS study protocol. *Inj Prev* 2014;20:e7.
2. Keay L, Palagyi A, Do V, et al. Vision and driving status of older Australians with cataract: an investigation of public hospital waiting lists. *Clin Exp Optom* 2016;99:449-455.
3. Palagyi A, Rogers K, Meuleners L, et al. Depressive symptoms in older adults awaiting cataract surgery. *Clin Exp Ophthalmol* 2016;44:789-796.
4. Palagyi A, Morlet N, McCluskey P, et al. Visual and refractive associations with falls after first-eye cataract surgery. *J Cataract Refract Surg* 2017;43:1313-1321.
